# Supplementary material for: A reduction-secretion system contributes to roxarsone (V) degradation and efflux in Brevundimonas sp. M20
Source: Research Square preprint supplement (doi:10.21203/rs.3.rs-5363972/v1), 2024-11-19
Supplement: Supplementary file 1 [file 0d72bcb55927b6431716435d.docx]

**Supplementary Materials for**

**A** **reduction-****secretion system contributes to roxarsone (V) resistance in** ***Brevundimonas* sp. M20**

**Xuehui Zonga#, Minghui Yub#, Jiahui Wangb, Congcong Li c, Bing Wang c,** **Yongan Wangd[[1]](#footnote-1)***

a, College of Biological and Environmental Engineering, Shandong University of Aeronautics, Binzhou256600, Shandong, China

b, Biomedical Sciences College & Shandong Medicinal Biotechnology Centre, Shandong First Medical University & Shandong Academy of Medical Sciences, Ji’nan 250117, Shandong, China

c, Shandong Quancheng Test & Technology Limited Company, Ji’nan 250101, Shandong, China

d, School of Laboratory Animal & Shandong Laboratory Animal Center, Shandong First Medical University & Shandong Academy of Medical Sciences, Ji’nan 250117, Shandong, China

This PDF file includes:

Supplementary Text

Figures. S1-S3

Tables S1 to S2

**Table S1** Bacterial strains and plasmids used in this study

| **Strains or plasmids** | **Relevant description** | **Reference** | |
| --- | --- | --- | --- |
| **Strains** |  | |  | |
| *Brevundimonas* sp. M20 | Arsenic-resistant strain with an *ars* cluster and a *met* operon | | This study | |
| *E. coli* DH5α | Strain used for gene clone | | Sangon | |
| *E. coli* BL21(DE3) | Strain used for protein expression | | Sangon | |
| **Plasmids** |  | |  | |
| pMD18-T | General cloning vector | | Takara | |
| pET-15b | Plasmid for protein expression and purification | | This lab | |

**Table S2** Primers used in this study

| Primer ID | Primer sequence (5′ →3′) |
| --- | --- |
| Pamp-F3 | GGTACCGACGAAAGGGCCTCGTGATAC |
| Pamp-R3 | GCCCAGATCGGTATCGGTCATACTCTTCCTTTTTCAATATTATTGAAGC |
| BsNtrA-F3 | GCTTCAATAATATTGAAAAAGGAAGAGTATGACCGATACCGATCTGGGC |
| BsNtrA-R3 | GATTGTGGAAGATCGTGATGGTCATCTAGAGCTTCCATTCAGTGATGGC |
| ArsC2-F3 | GCTTCAATAATATTGAAAAAGGAAGAGTATGACCGATACCGATCTGGGC |
| BsexpA-F3 | GAAAAGGTGCTGGACGTTCTCTAAATGACCTCCCCCCAGTCAG |
| BsExpA-R3 | TCTAGATCAAGGGGCCTGCGTCGTC |
| BsExpA-F1 | GCTTCAATAATATTGAAAAAGGAAGAGTATGACCTCCCCCCAGTCAG |
| ArsC2-F1 | GCTTCAATAATATTGAAAAAGGAAGAGTATGACCGATACCGATCTGGGC |
| ArsC2-R1 | TCTAGAttagagaacgtccagcaccttttc |
|  |  |


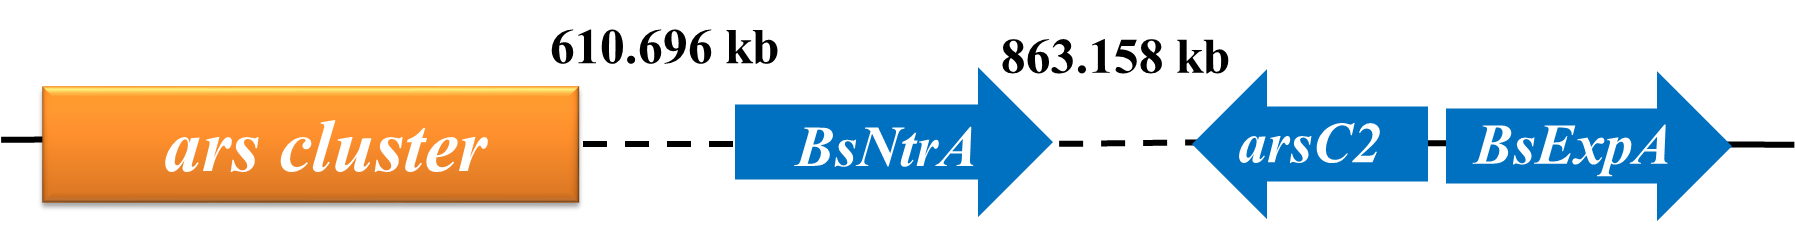


**Fig. S1. Linear arrangement of Rox(V) resistance genes in Brevundimonas sp. M20.** All block arrows indicate length and orientation. The numbers in each box represent the nucleotide sequence identity. The distance between ars cluster and Rox(V) resistance genes is indicated by the number of base pair.


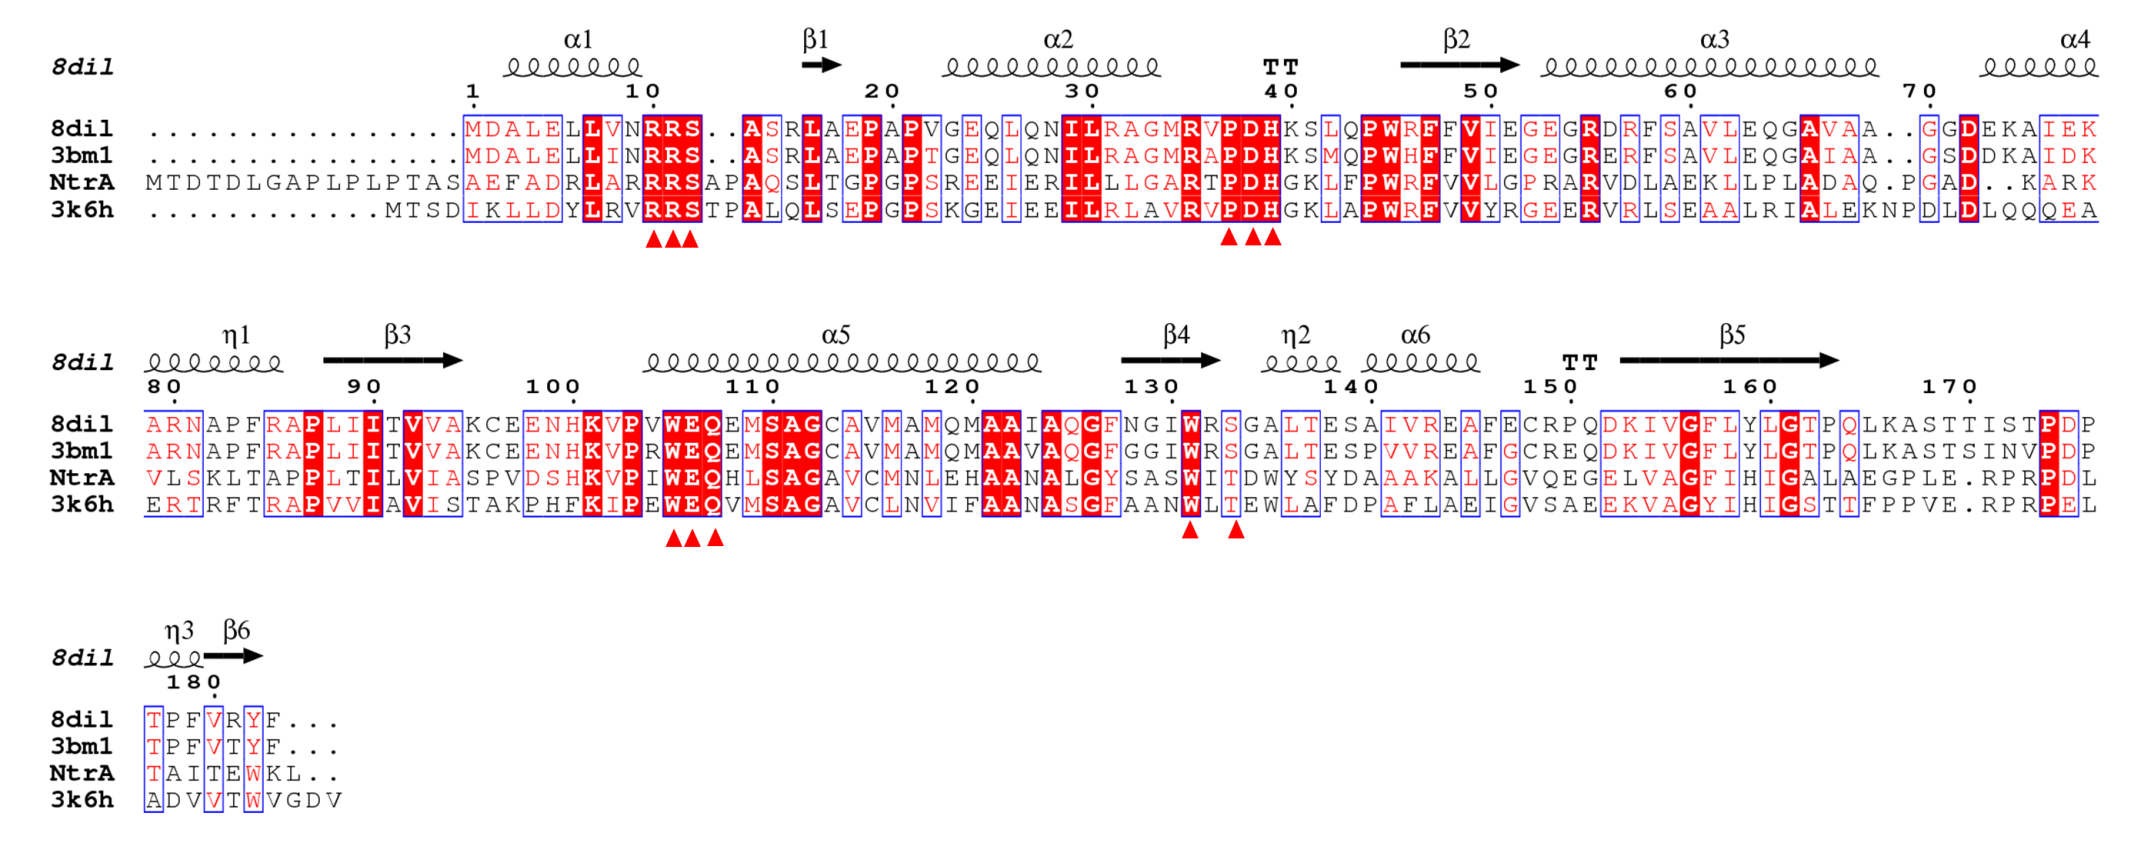


**Fig. S2. Alignment of amino acid sequences of BsNtrA.** The Red triangles represent the nucleotide sequence identity as FMN binding motif.


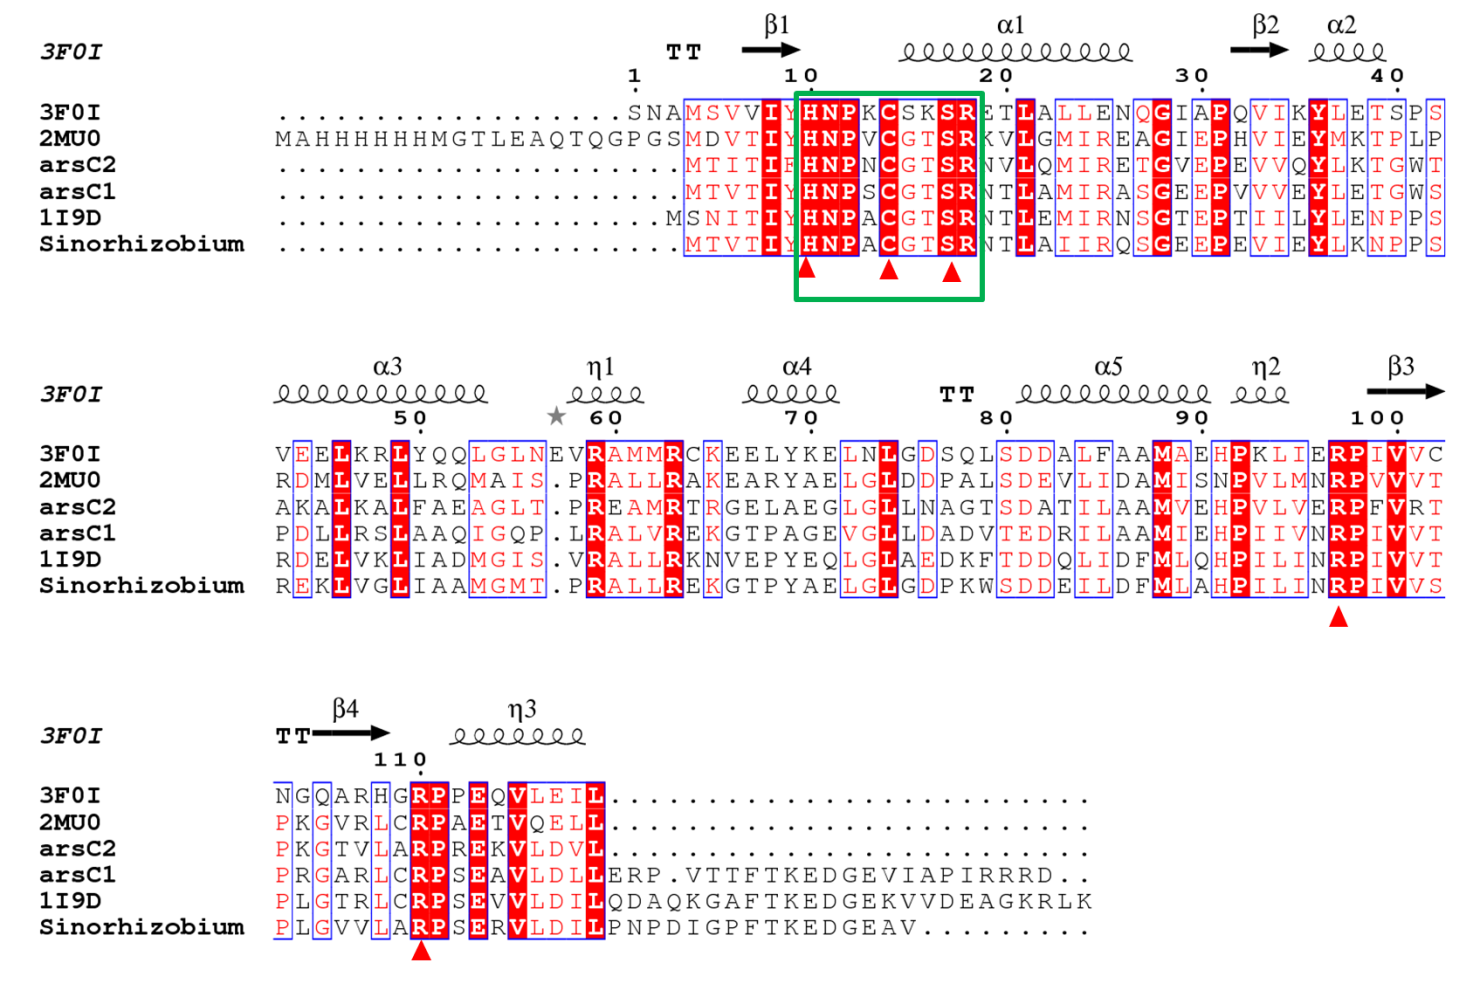


**Fig. S3. Alignment of amino acid sequences of ArsC2.** The green box represents the catalytic sequence motif. Red triangles represent key residues for reduction.

1. *Corresponding author: School of Laboratory Animal & Shandong Laboratory Animal Center, Shandong First Medical University & Shandong Academy of Medical Sciences, Ji’nan 250117, Shandong, China

   Email: wya668@163.com (Y.A. Wang).

   # Xuehui Zong and Minghui Yu have contributed equally. [↑](#footnote-ref-1)
